# Supplementary material for: Non-Hermitian physics for optical manipulation uncovers inherent instability of large clusters
Source: PubMed Central journal article supplement (PMC8593170; doi:10.1038/s41467-021-26732-8), 2021-11-15
Supplement: 41467_2021_26732_MOESM2_ESM.pdf [file 41467_2021_26732_MOESM2_ESM.pdf]

## **Description of Additional Supplementary Files**

**Supplementary Movie 1:** Trajectories of optically bound particles in a triangular optical lattice in vacuum.

**Supplementary Movie 2:** Trajectories of optically bound particles in a triangular optical lattice in water.
